# Supplementary material for: Novel layered structures of the crystals based on C-methylcalix[4]resorcinarene formed at high temperatureElectronic supplementary information (ESI) available: Structures of compounds 8, 9, 10 and 12 (4 figures). See http://www.rsc.org/suppdata/ce/b3/b307471d/
Source: Royal Society of Chemistry journal article supplement (doi:10.1039/b307471d), 2003-01-01
Supplement: figures.pdf [file figures.pdf]

Supporting Information for  
Novel Layered Structures of the Crystals Based on *C*-Methylcalix[4]resorcinarene  
Formed at High Temperature

A. Nakamura,<sup>\*a</sup> T. Sato<sup>a</sup> and R. Kuroda<sup>\*ab</sup>

<sup>a</sup> Kuroda Chir morphology Project, ERATO, JST, 4-7-6 Komaba, Meguro-ku, Tokyo 153-0041, Japan.

E-mail: [asao@chiomor.jst.go.jp](mailto:asao@chiomor.jst.go.jp)

<sup>b</sup> Graduate School of Arts and Sciences, The University of Tokyo, Komaba, Meguro-ku, Tokyo 153-

8902, Japan. E-mail: [ckuroda@mail.ecc.u-tokyo.ac.jp](mailto:ckuroda@mail.ecc.u-tokyo.ac.jp)

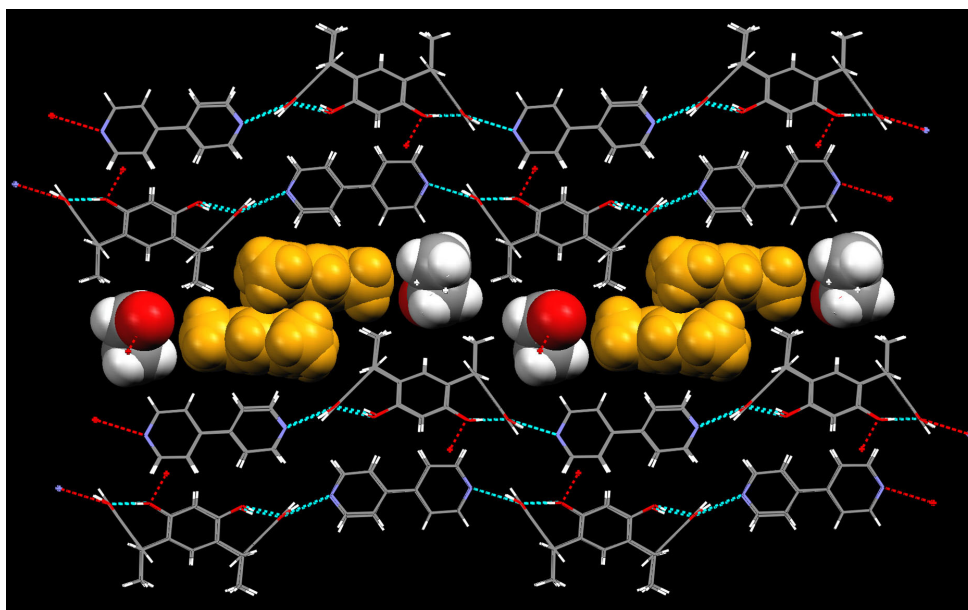

Fig. S1 1D linear structure of 8.

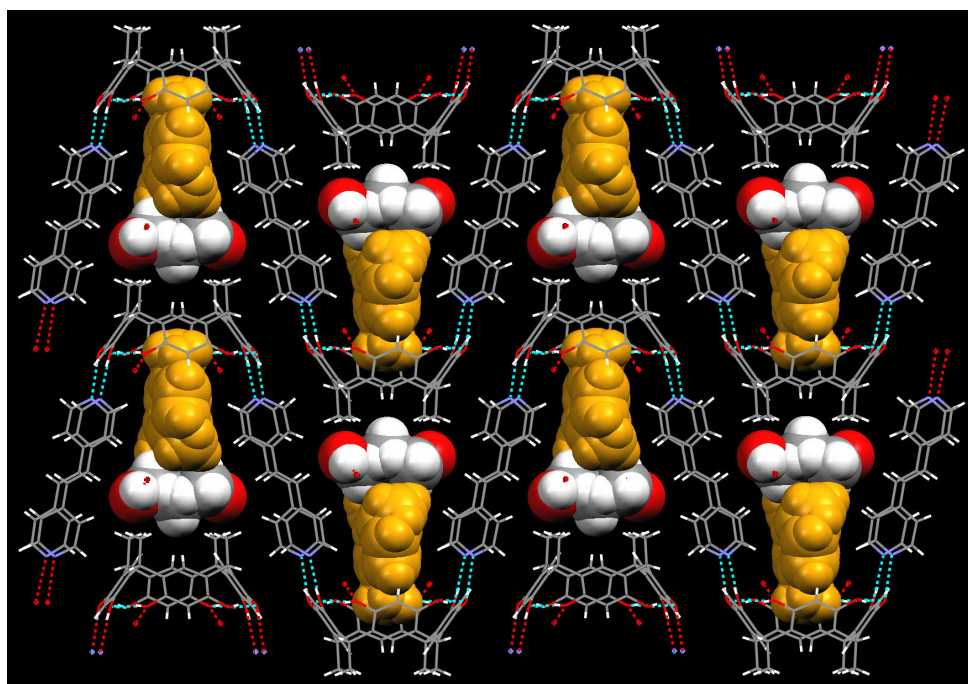

Fig. S2 1D wave-like structure of 9.

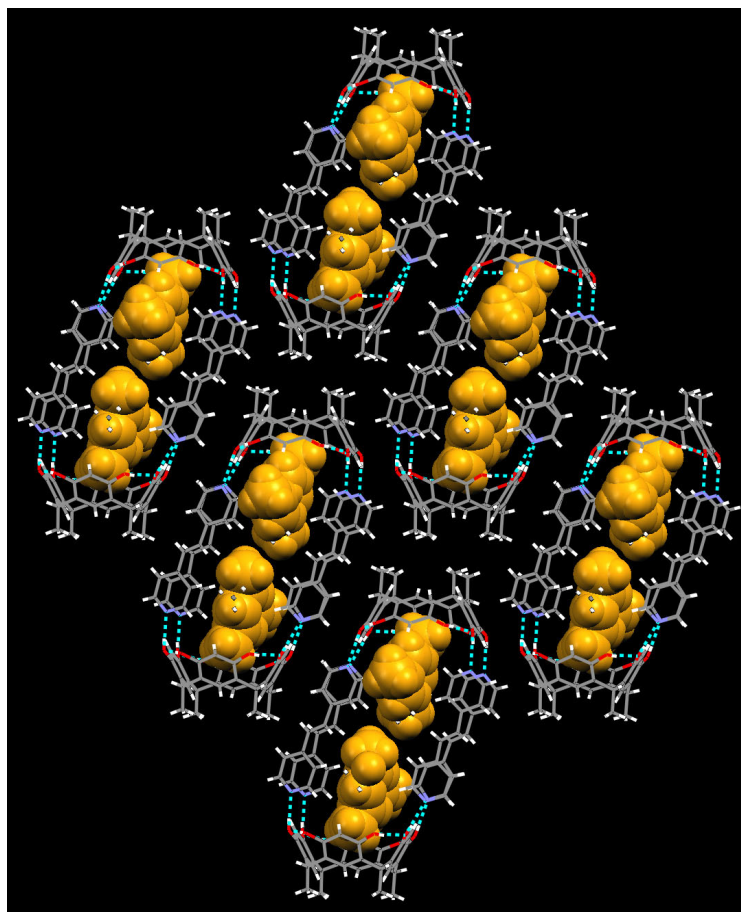

Fig. S3 Carcerand structure of 10.

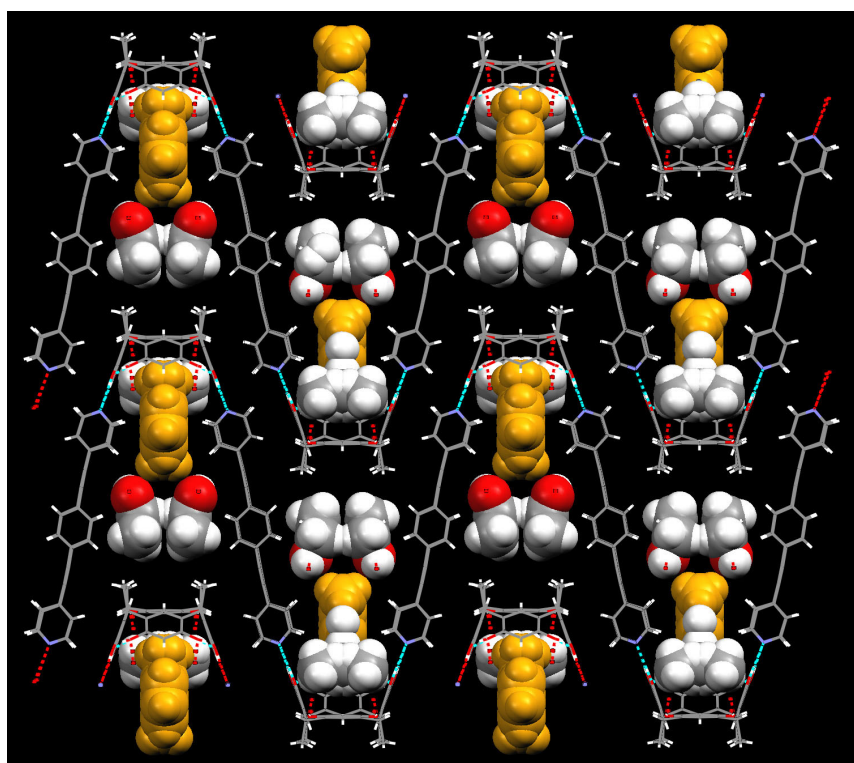

Fig. S4 1D wave-like structure of 12.
